# Supplementary material for: Obstetric and neonatal outcomes: Antiseizure medication profile and seizure types in pregnant women in a vulnerability state, Brazil
Source: Research Square preprint supplement (doi:10.21203/rs.3.rs-2152558/v3), 2023-01-23
Supplement: Supplementary file 1 [file 4ecb6a40b2d005b75dc11f7c.docx]

**Table S3. Regression analysis between obstetric and neonatal outcomes and ASM in polytherapy (N=229)**

| Polytherapy**.** | **PrH** | **Oligohydramnios** | **Miscarriage** | **Maternal ICU** | **Preeclampsia/ Eclampsia** | **Stillbirth** | **Neonatal**  **heart**  **disease** | **Neonatal ICU** | **Premature**  **Delivery**  **<37 weeks** | **Low birth weight** |
| --- | --- | --- | --- | --- | --- | --- | --- | --- | --- | --- |
| **Carbamazepine and Phenobarbital** | 0.54  [0.11; 2.67] | NA | 0.60  [0.15; 2.34] | 1.85  [0.54; 6.26] | NA | 0.56  [0.06;5.05] | NA | 1.82  [0.15;21.33] | 0.82  [0.23; 2.91] | 1.17  [0.32;4.27] |
| **Carbamazepine and Diazepam** | 0.86  [0.16; 4.40] | 1.83  [0.17; 19.13] | 0.23  [0.02;1.94] | 2.11  [0.55; 8.00] | NA | NA | 2.79  [0.23; 33.26] | NA | 1.30  [0.35; 4.82] | 1.85  [0.48;7.04] |
| **Phenobarbital and Valproic acid** | 1.78  [0.41; 7.67] | 2.03  [0.19; 21.31] | 0.87  [0.27; 4.65] | 0.80  [0.15; 4.07] | 2.03  [0.19; 21.31] | NA | 3.09  [0.25; 37.04] | NA | 2.33  [0.64; 8.43] | 3.37  [0.90;12.62] |
| **Phenobarbital and**  **Diazepam** | 1.05 [0.25; 4.28] | NA | 0.65  [0.16; 2.57] | 2.04  [0.59;6.98] | 1.29  [0.12; 13.26] | 0.61  [0.06;5.48] | NA | 1.96  [0.16;23.09] | 2.81  [0.87; 8.99] | 1.30  [0.35;4.77] |
| **Lamotrigine and Valproic acid** | 2.66 [0.43; 16.22] | NA | 0.64  [0.07; 5.88] | NA | 4.86  [0.42; 55.71] | 2.33  [0.23;23.34] | NA | 7.40  [0.56;96.26] | 0.68  [0.07; 6.51] | 0.91  [0.09;8.82] |

**NA: It was not possible to perform this analysis.**
