# Supplementary material for: Obstetric and neonatal outcomes: Antiseizure medication profile and seizure types in pregnant women in a vulnerability state, Brazil
Source: Research Square preprint supplement (doi:10.21203/rs.3.rs-2152558/v3), 2023-01-23
Supplement: Supplementary file 2 [file 5f4e60c34a286907858d3075.docx]

**Table S4. Univariable and multivariable adjusted logistic regression analysis of obstetric and neonatal outcomes between pregnant women with epilepsy using and not using ASM, and ASM in monotherapy and polytherapy (n=229).**

| **Dependent Variables** | **Univariable analysis** | | | | **Analysis with adjustment for age, type of delivery, marital status,**  **place of birth** | | | |
| --- | --- | --- | --- | --- | --- | --- | --- | --- |
| **Monotherapy** | | **Polytherapy** | | **Monotherapy** | | **Polytherapy** | |
| **OR** | **IC 95%** | **OR** | **IC 95%** | **OR** | **IC 95%** | **OR** | **IC 95%** |
| **Obstetric outcomes (PrH, vaginal bleeding, preeclampsia and eclampsia)** | 1.89 | 0.71; 5.01 | 1.13 | 0.40; 3.19 | 1.90 | 0.68; 5.28 | 0.94 | 0.31; 2.84 |
| **Neonatal outcomes (Stillbirth and MCM)** | 1.12 | 0.22; 5.56 | 1.84 | 0.37; 9.06 | NA | NA | NA | NA |

**Reference: pregnant women with epilepsy not taking ASM**

**NA: It was not possible to perform this analysis.**
