# Supplementary material for: Obstetric and neonatal outcomes: Antiseizure medication profile and seizure types in pregnant women in a vulnerability state, Brazil
Source: Research Square preprint supplement (doi:10.21203/rs.3.rs-2152558/v3), 2023-01-23
Supplement: Supplementary file 3 [file 6f4c554bd750bf5be2d8c435.docx]

## Table S1. Logistic regression analysis of types of ASM in pregnant women with epilepsy (n=229)

| **Drug Treatment** | **N** | **%** |
| --- | --- | --- |
| **Oxcarbazepine Levetiracetan** |  |  |
| **No** | 229 | 100,0 |
| **Others drugs** |  |  |
| **yes** | 26 | 11,1 |
| **no** | 208 | 88,9 |
| **Missing data** | 4 | 1,7 |
| **Carbamazepine, Phenobarbital and**  **Phenytoin** | 2 | 1,0 |
| no | 195 | 99,0 |
| total | 197 | 100,0 |
| **Carbamazepine and Phenobarbital** |  |  |
| yes | 18 | 9,1 |
| no | 178 | 90,9 |
| total | 197 | 100,0 |
| **Carbamazepine and Phenytoin** |  |  |
| yes | 4 | 2,0 |
| no | 193 | 98,0 |
| total | 197 | 100,0 |
| **Carbamazepine and Diazepam** |  |  |
| yes | 13 | 6,6 |
| No | 184 | 93,4 |
| total | 197 | 100,0 |
| **Phenytoin and Diazepam** |  |  |
| yes | 6 | 3,0 |
| no | 191 | 97,0 |
| total | 197 | 100,0 |
| **Phenobarbital and**  **Diazepam** |  |  |
| yes | 17 | 91,4 |
| no | 180 | 8,6 |
| total | 197 | 100,0 |
| **Valproic acid and**  **Diazepam** |  |  |
| yes | 6 | 3,0 |
| no | 191 | 97,0 |
| total | 197 | 100,0 |
| **Phenobarbital and Phenytoin** |  |  |
| yes | 13 | 6,6 |
| no | 184 | 93,4 |
| total | 197 | 100,0 |
| **Phenobarbital and Valproic acid** |  |  |
| yes | 12 | 6,1 |
| no | 185 | 93,9 |
| total | 197 | 100,0 |
| **Lamotrigine and Valproic acid** |  |  |
| yes | 6 | 3,0 |
| no | 191 | 97,0 |
| total | 197 | 100 |
