# Supplementary material for: Obstetric and neonatal outcomes: Antiseizure medication profile and seizure types in pregnant women in a vulnerability state, Brazil
Source: Research Square preprint supplement (doi:10.21203/rs.3.rs-2152558/v3), 2023-01-23
Supplement: Supplementary file 4 [file ed223f7e33532838a49c83f2.docx]

**Table S2. Regression analysis between neonates outcomes and drugs used in monotherapy (n=115)**

| **Monotherapy** | **Stillbirth** | **Neonatal ICU** | **Neonatal**  **heart disease** | **Premature Delivery**  **<37 weeks** | **Low birth weight** |
| --- | --- | --- | --- | --- | --- |
| **OR [IC95%]** | **OR [IC95%]** | **OR [IC95%]** | **OR [IC95%]** | **OR [IC95%]** |
| **Phenobarbital** | 0.62  [0.12; 3.25] | NA | NA | 0.60  [0.24; 1.48] | 0.90  [0.33; 2.43] |
| **Valproic acid** | 3.43  [0.34; 34.22] | NA | NA | 3.68  [0.69; 19.52] | NA |
| **Carbamazepine** | 1.51  [0.26; 8.75] | NA | NA | 1.24  [0.45; 3.40] | 2.42  [0.86; 6.77] |
| **Phenytoin** | NA | NA | NA | NA | NA |
| **Diazepam** | NA | NA | NA | NA | NA |
| **Lamotrigine** | NA | NA | NA | 2.34  [0.37; 14.90] | NA |

Reference: no outcomes presents.

NA: It was not possible to perform this analysis.
